# Supplementary material for: Preventive Effects of Green Tea Extract against Obesity Development in Zebrafish
Source: MDPI journal article supplement (doi:10.3390/molecules26092627), 2021-04-30
Supplement: s1 [file s1]

## Supplementary Figure S1

### Material and Methods

#### *HPLC analysis*

The green tea extract was dissolved in water to form a 10 mg/mL solution and then filtered. Analysis of the GTE was conducted using high-performance liquid chromatography (HPLC) on an HPLC analysis system (JASCO Corporation, Tokyo, Japan) under the following conditions: Develosil ODS-5 ( $\Phi 4.6 \times 150$  mm; Nomura Chemical, Seto, Japan); UV detector at 280 nm; mobile phase of A = H<sub>2</sub>O and B = MeOH; gradient: A:B = 100:0, 30 min; A:B = 0:100, 10 min; A:B = 0:100, 10 min; A:B = 100:0, 10 min; injection volume 1  $\mu$ L; flow rate 1 mL/min. (-)-Epigallocatechin (EGC), (-)-epigallocatechin gallate (EGCG), (-)-epicatechin (EC), and (-)-epicatechin gallate (ECG) were identified by LC-MS analysis.

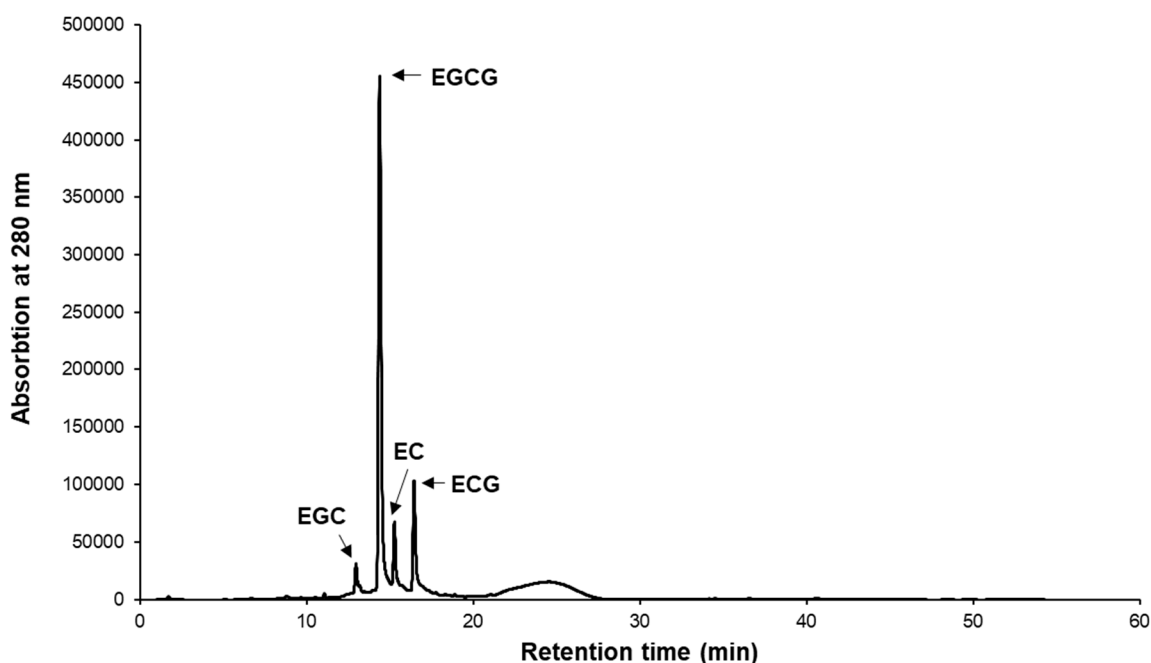

**Figure S1. Chromatograms of HPLC analysis of GTE.** The peaks were detected at UV 280 nm absorbance. (-)-Epigallocatechin (EGC), (-)-epigallocatechin gallate (EGCG), (-)-epicatechin (EC), (-)-epicatechin gallate (ECG).
